# Supplementary material for: Proinflammatory isoforms of IL-32 as novel and robust biomarkers for control failure in HIV-infected slow progressors
Source: PubMed Central journal article supplement (PMC4792165; doi:10.1038/srep22902), 2016-03-15
Supplement: srep22902-s1.pdf [file srep22902-s1.pdf]

**Proinflammatory isoforms of IL-32 as novel and robust biomarkers for control failure in HIV-infected slow progressors**

Mohamed El-Far<sup>1\*</sup>, Pascale Kouassi<sup>1,2</sup>, Mohamed Sylla<sup>1</sup>, Yuwei Zhang<sup>1,2</sup>, Ahmed Fouda<sup>1</sup>, Thomas Fabre<sup>1,2</sup>, Jean-Philippe Goulet<sup>3</sup>, Julien van Grevenynghe<sup>4</sup>, Terry Lee<sup>5</sup>, Joel Singer<sup>5</sup>, Marianne Harris<sup>6</sup>, Jean-Guy Baril<sup>7</sup>, Benoit Trottier<sup>8</sup>, Petronela Ancuta<sup>1,2</sup>, Jean-Pierre Routy<sup>9</sup>, Nicole Bernard<sup>10</sup> and Cécile L. Tremblay<sup>1,2\*</sup> for the Investigators of the Canadian HIV<sup>+</sup> Slow Progressor Cohort.

**Supplementary information**

## Supplementary Figure legends

**Supplementary Figure S1: Impact of gender (a) and age (b) on the decline of CD4<sup>+</sup> T-cell counts in the different slow progressor (SP) subgroups.** Mixed effects regression analysis on CD4 decline for Elite controllers (n=45) (Left upper panel), Virologic controllers (n=68) (Right upper panel), Non-virologic controllers (n=33) (Left lower panel) compared to typical progressors (Primo) (n=490) (Right lower panel). NS= non-significant.

**Supplementary Figure S2: Impact of race on the decline of CD4<sup>+</sup> T-cell counts in the different slow progressor (SP) subgroups.** Mixed effects regression analysis on CD4 decline for Elite controllers (n=45) (Left upper panel), Virologic controllers (n=68) (Right upper panel), Non-virologic controllers (n=33) (Left lower panel) compared to typical progressors (Primo) (n=490) (Right lower panel). NS= non-significant.

**Supplementary Figure S3: Impact of sexual *versus* non-sexual (a) and intravenous drug use (b) on the decline of CD4<sup>+</sup> T-cell counts in the different slow progressor (SP) subgroups.** Mixed effects regression analysis on CD4 decline for Elite controllers (n=45) (Left upper panel), Virologic controllers (n=68) (Right upper panel), Non-virologic controllers (n=33) (Left lower panel) compared to typical progressors (Primo) (n=490) (Right lower panel). NS= non-significant.

**Supplementary Figure S4: Transcriptional analysis by microarray.** Shown is a heatmap for top differentially expressed genes including the IL-32 $\alpha$  (p<0.05, fold change with a cut-off of 1.3 between V1 and V2 for each of 5 subjects who lost HIV control).

**Supplementary Figure S5: Cell-associated total IL-32.** (a) Total cell protein from PBMCs of HIV<sup>neg</sup> (n=7), EC (n=10) and TP (n=9) was determined following cell lysis and used to measure total IL-32 by ELISA. Shown are the levels of IL-32, in 1µg of total cell protein. (b) Correlations between the levels of plasma and cell-associated total IL-32 from the same subjects (EC, n=8 and TP, n=9). Kruskal-Wallis and Dunn's post tests were used to assess the significance of between-group differences in panel A. Spearman correlation tests were used to assess the significance of the correlation between cells associated and plasma total IL-32 from the same subjects.  $\rho$ = correlation coefficient. P-values over lines linking 2 data sets refer to comparisons of these 2 groups.

**Supplementary Figure S6:** Correlations between sCD14 and CD4<sup>+</sup> T-cell counts (a), Log<sub>10</sub> VL (b) and CD4/CD8 ratio (c) measured in plasma from the same EC (n=19), VC (n=22), NVC (n=6) subjects at V1 and V2. A Spearman correlation test was used to assess the significance of correlations between the 2 measured parameters. The correlation coefficient ( $\rho$ ) and p-value for each comparison are shown over the graphs.

**Supplementary Figure S7:** Correlations between IL-6 and CD4<sup>+</sup> T-cell counts (a), Log<sub>10</sub> VL (b) and CD4/CD8 ratio (c) measured in plasma from the same EC (n=19), VC (n=22), NVC (n=6) subjects at V1 and V2. A Spearman correlation test was used to assess the significance of correlations between the 2 measured parameters. The correlation coefficient ( $\rho$ ) and p-value for each comparison are shown over the graphs.

**Supplementary Figure S8:** Correlation between IL-32 levels in plasma at V1 from EC (n=19), VC (n=22), NVC (n=6)) and (a) sex (Men n=36, Women n=11), (b) age (yrs), (c) time between V1 and V2 (months). A Mann-Whitney test was used to assess the significance of between-group differences in

panel A and Spearman correlation test ( $\rho$ ) was used to assess the significance of correlations between the 2 measured parameters.

# Supplementary Figure S1

a)

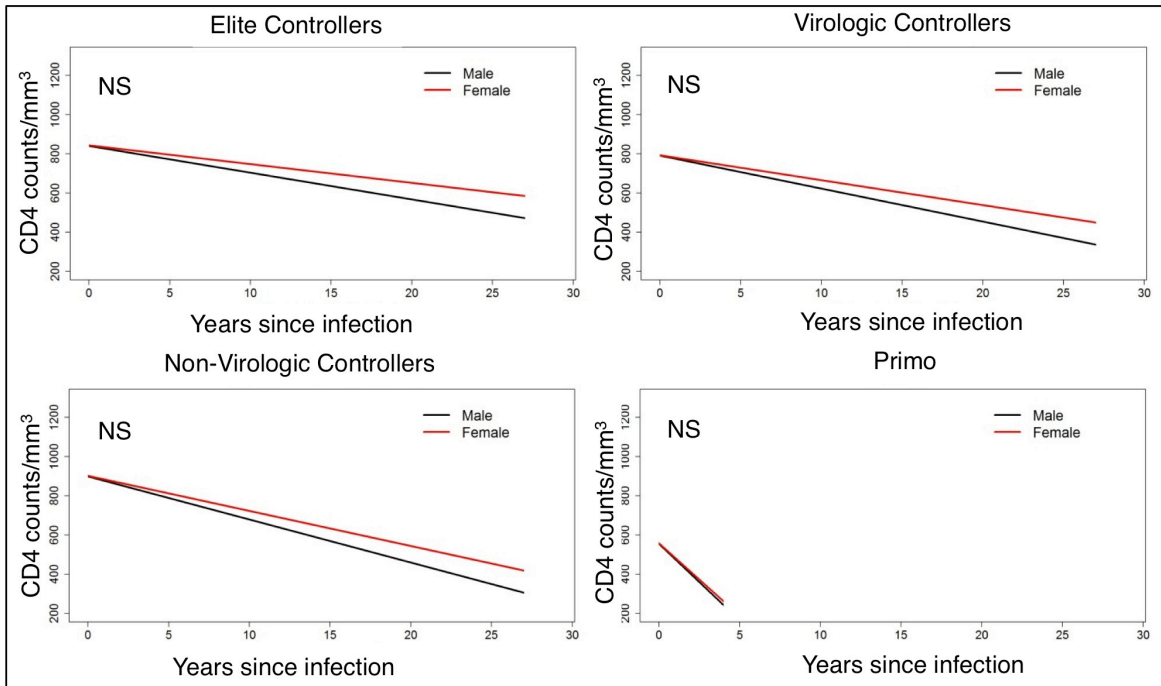

b)

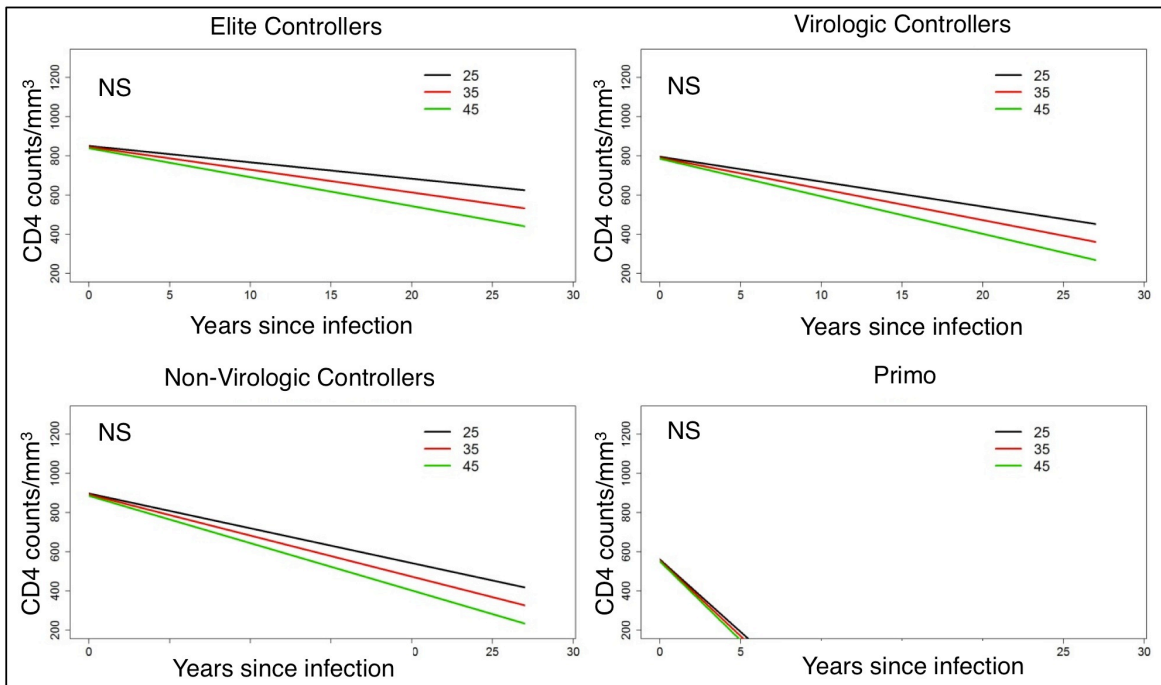

# Supplementary Figure S2

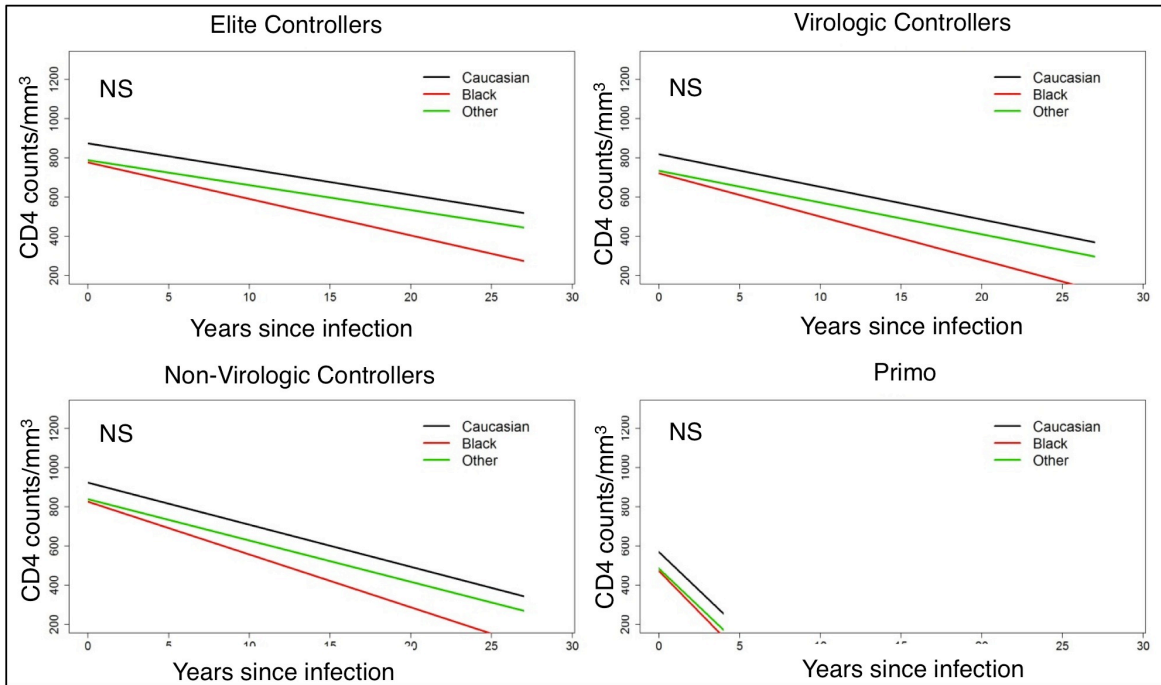

# Supplementary Figure S3

a)

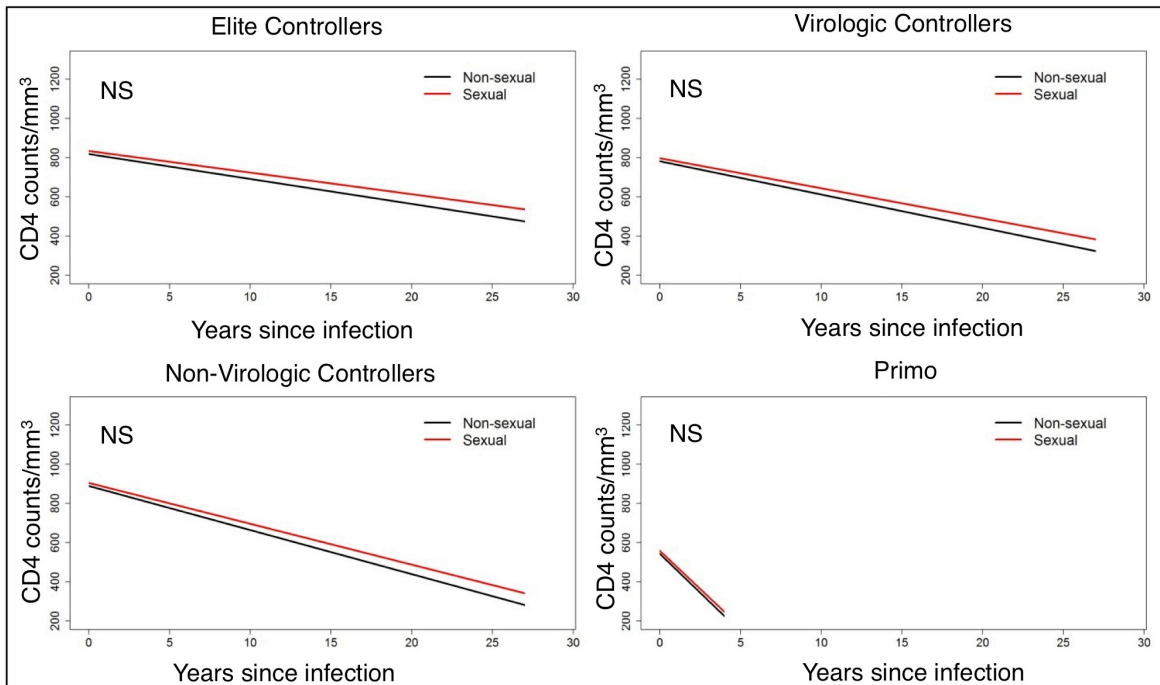

b)

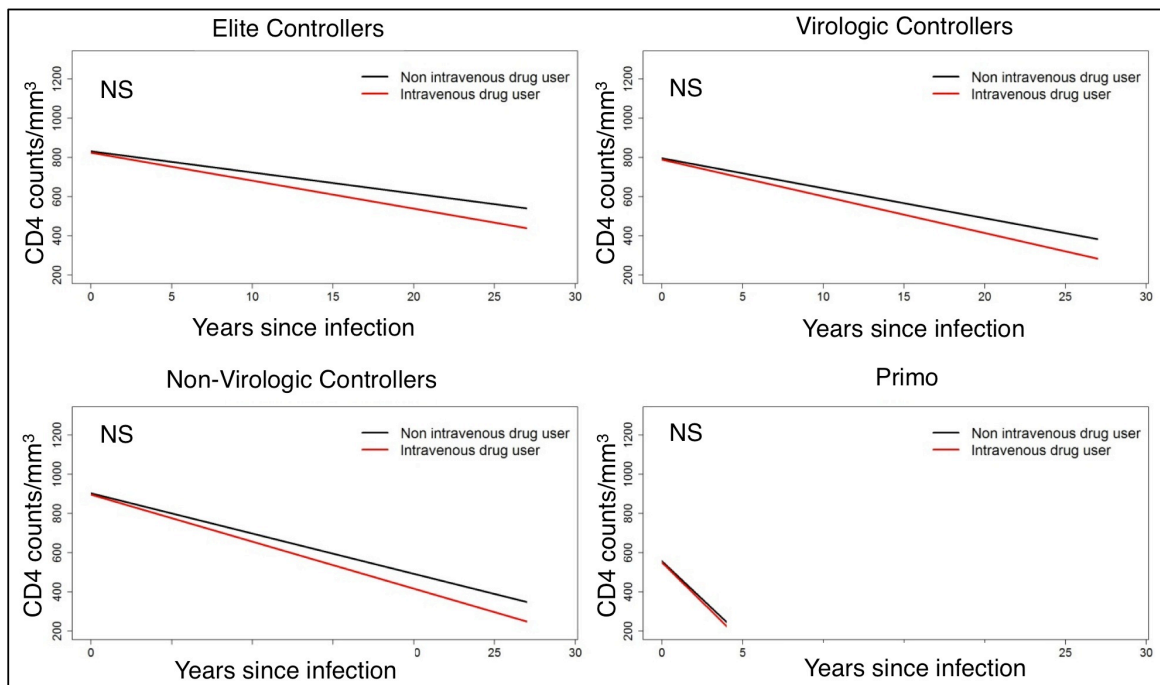

Supplementary Figure S4

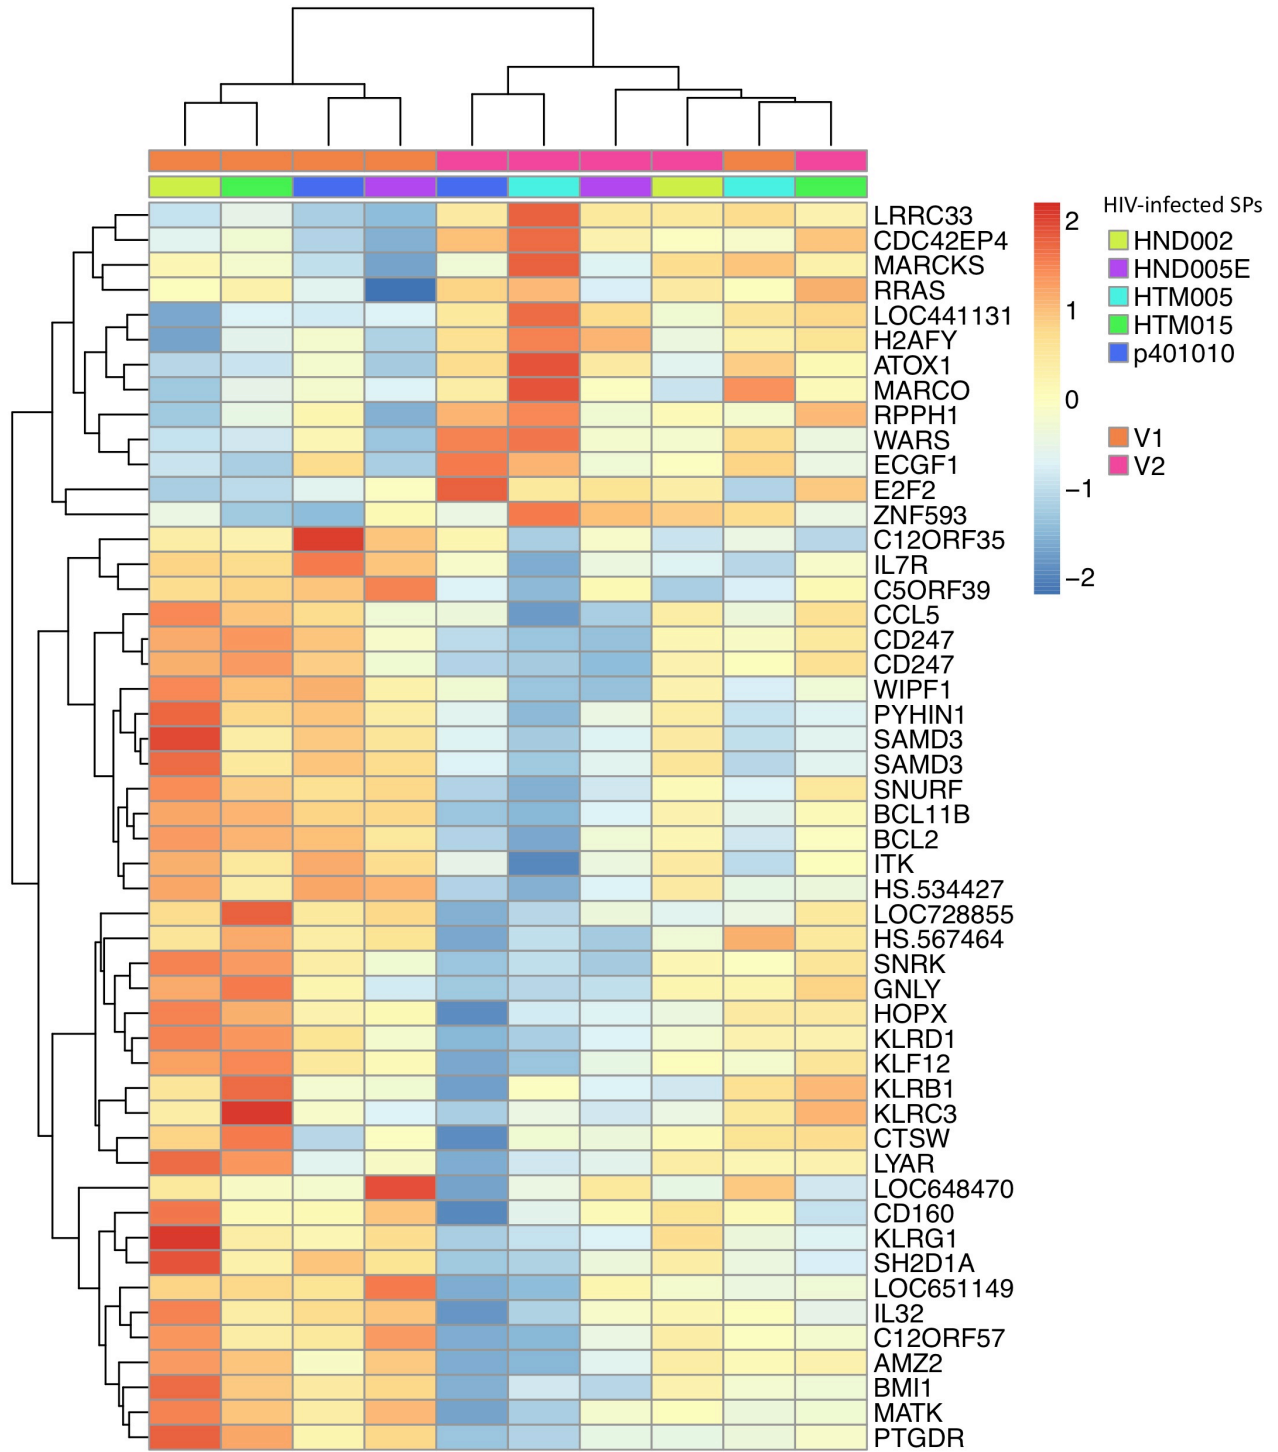



## Supplementary Figure S5

a)

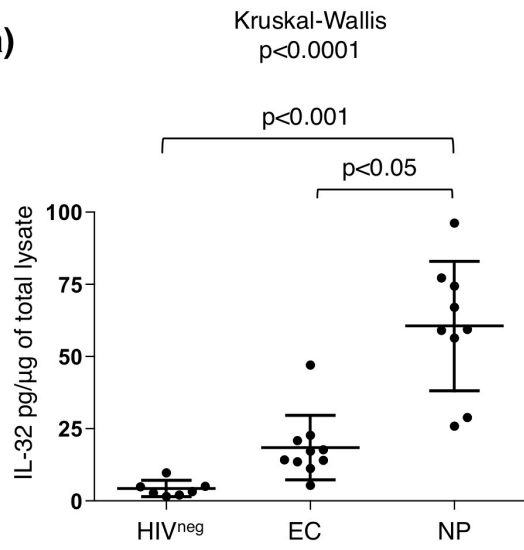

b)

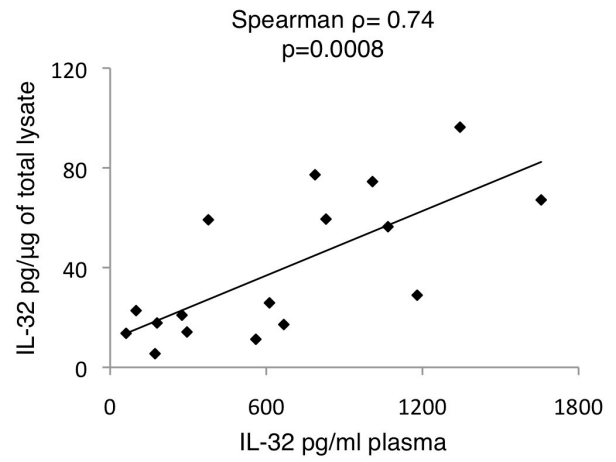

Supplementary Figure S6

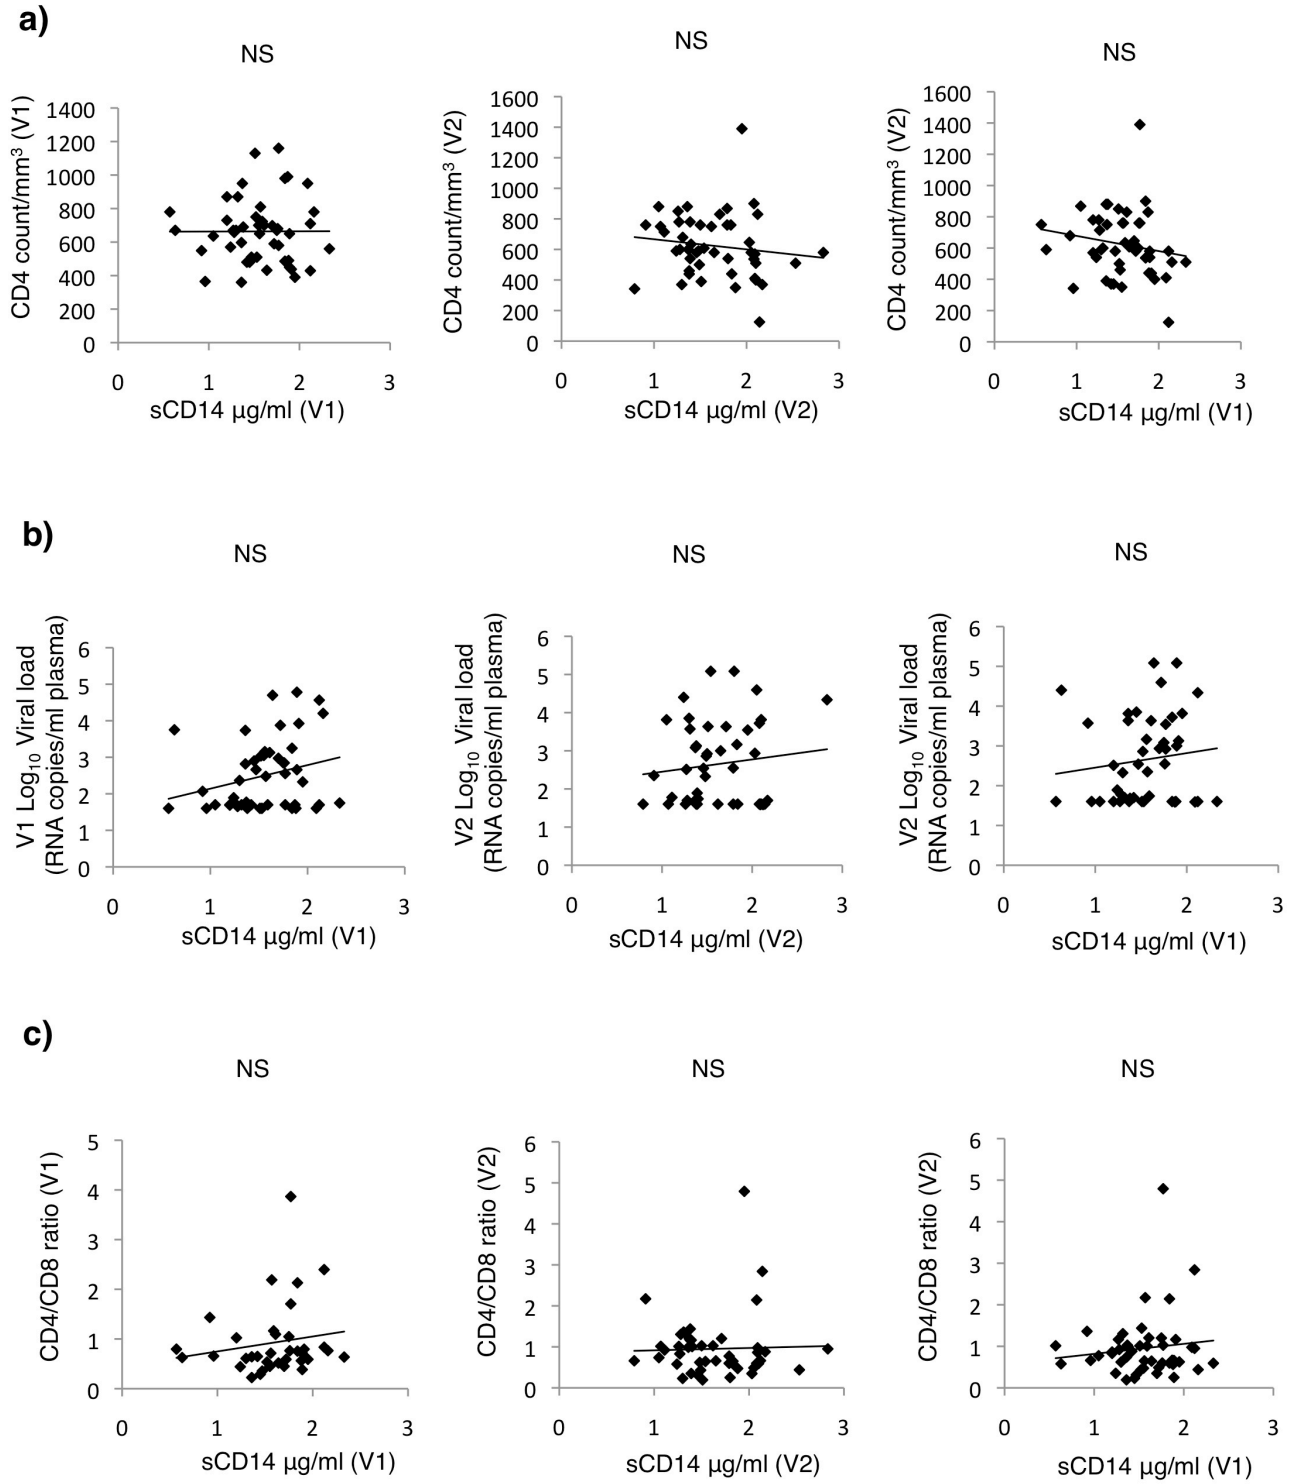

# Supplementary Figure S7

a)

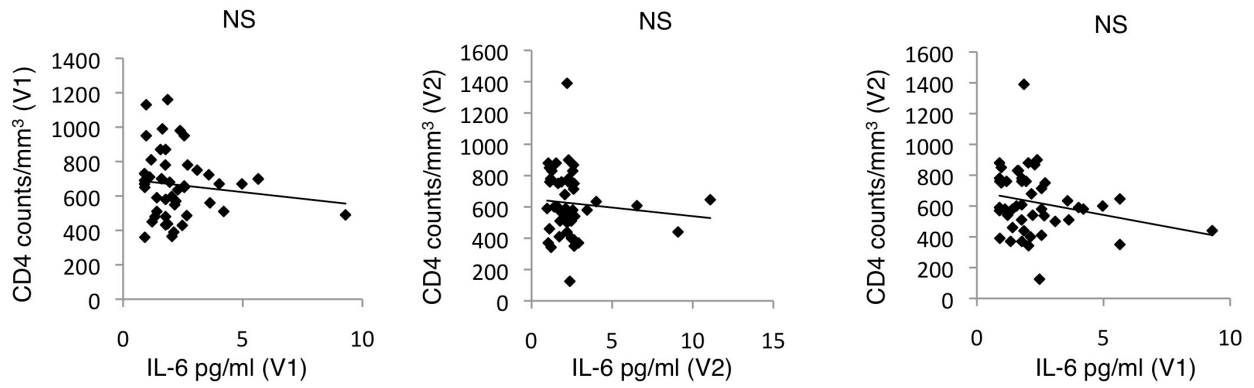

b)

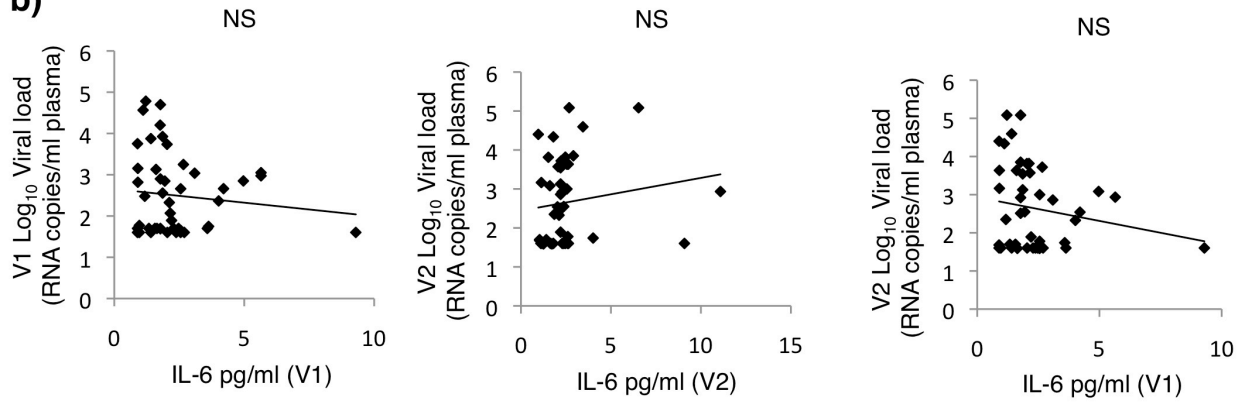

c)

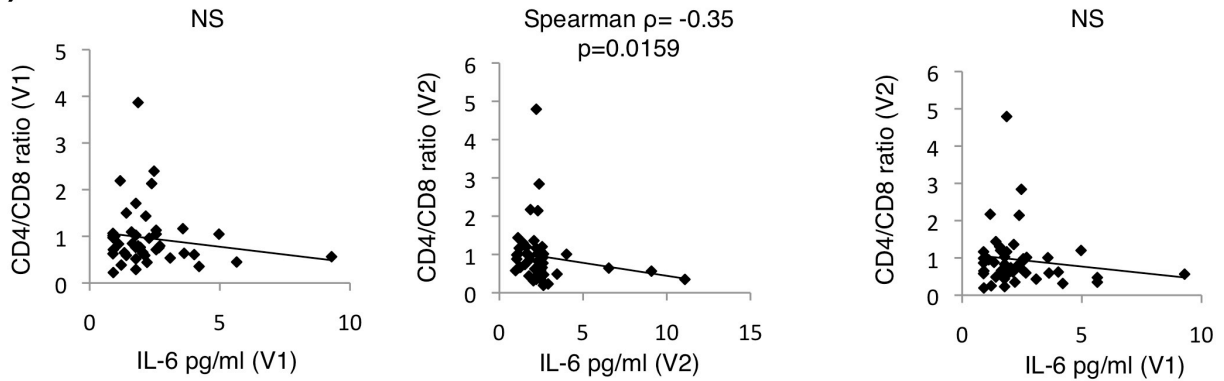

# Supplementary Figure S8

a)

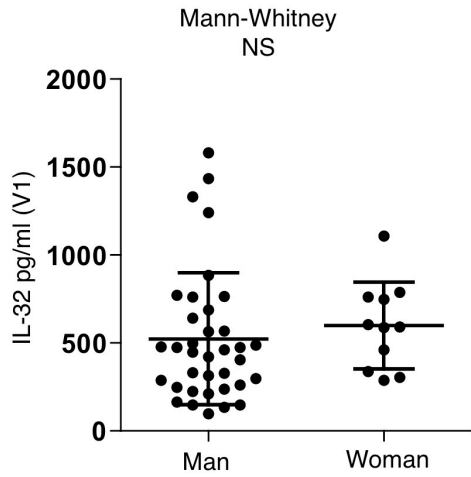

b)

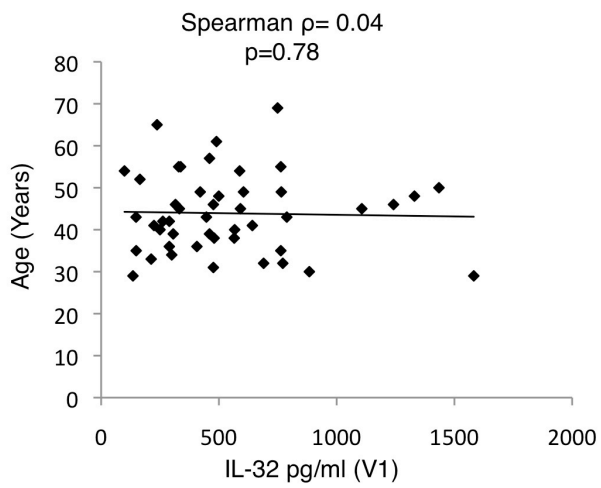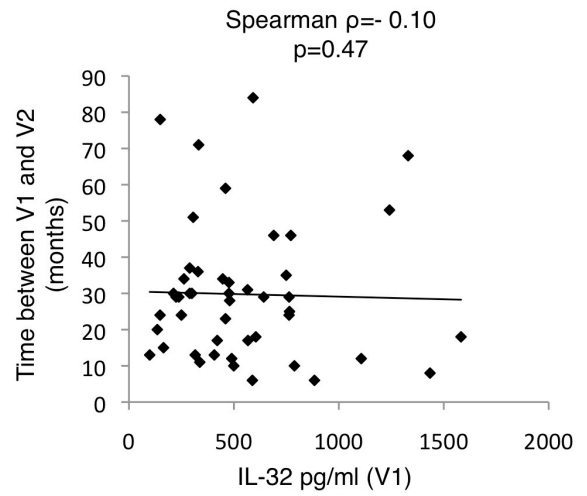

**Supplementary Table S1: Demographic and disease history characteristics of the study subjects.**

| Variable                                | All patients<br>(n=636) | Slow progressors  |                     |                         | PRIMO cohort<br>(n=490) |
|-----------------------------------------|-------------------------|-------------------|---------------------|-------------------------|-------------------------|
|                                         |                         | Elite<br>(n=45)   | Virologic<br>(n=68) | Non-virologic<br>(n=33) |                         |
| Sex - male, n (%) <sup>A</sup>          | 557 (87.6)              | 31 (68.9)         | 48 (70.6)           | 26 (78.8)               | 452 (92.2)              |
| Race, n (%)                             |                         |                   |                     |                         |                         |
| Unknown                                 | 138 (21.7)              | 3 (6.7)           | 1 (1.5)             | 4 (12.1)                | 130 (26.5)              |
| Caucasian                               | 414 (65.1)              | 28 (62.2)         | 46 (67.6)           | 22 (66.7)               | 318 (64.9)              |
| Black                                   | 42 (6.6)                | 9 (20.0)          | 10 (14.7)           | 5 (15.2)                | 18 (3.7)                |
| Other                                   | 42 (6.6)                | 5 (11.1)          | 11 (16.2)           | 2 (6.1)                 | 24 (4.9)                |
| Modes of transmission, n (%)            |                         |                   |                     |                         |                         |
| Unknown                                 | 17 (2.7)                | 2 (4.4)           | 1 (1.5)             | 1 (3.0)                 | 13 (2.7)                |
| Sexual                                  | 529 (83.2)              | 35 (77.8)         | 60 (88.2)           | 29 (87.9)               | 405 (82.7)              |
| Intravenous drug user                   | 85 (13.4)               | 6 (13.3)          | 5 (7.4)             | 4 (12.1)                | 70 (14.3)               |
| Other                                   | 77 (12.1)               | 19 (42.2)         | 34 (50.0)           | 22 (66.7)               | 2 (0.4)                 |
| Age at diagnosis                        |                         |                   |                     |                         |                         |
| Unknown, n (%)                          | 26 (4.1)                | 2 (4.4)           | 1 (1.5)             | 3 (9.1)                 | 20 (4.1)                |
| Median (IQR)                            | 35.1 (28.4, 42.3)       | 35.4 (26.4, 43.9) | 34.8 (27.4, 39.8)   | 33.5 (27.3, 44.4)       | 35.5 (28.8, 42.4)       |
| Years infected at baseline <sup>B</sup> |                         |                   |                     |                         |                         |
| Unknown, n (%)                          | 75 (11.8)               | 0 (0)             | 0 (0)               | 0 (0)                   | 75 (15.3)               |
| Median (IQR)                            | 0.4 (0.2, 0.9)          | 7.4 (2.9, 17.5)   | 6.1 (3.1, 10.3)     | 8.8 (5.3, 15.5)         | 0.3 (0.2, 0.5)          |
| Age at baseline                         |                         |                   |                     |                         |                         |
| Unknown, n (%)                          | 78 (12.3)               | 2 (4.4)           | 1 (1.5)             | 3 (9.1)                 | 72 (14.7)               |
| Median (IQR)                            | 38.2 (30.6, 44.8)       | 46.0 (38.5, 54.1) | 41.4 (34.3, 48.4)   | 46.1 (34.0, 55.3)       | 36.1 (29.0, 42.7)       |
| CD4 count at baseline                   |                         |                   |                     |                         |                         |
| Unknown, n (%)                          | 85 (13.4)               | 0 (0)             | 0 (0)               | 0 (0)                   | 85 (17.3)               |
| Median (IQR)                            | 531 (406, 690)          | 730 (620, 928)    | 652 (550, 745)      | 650 (554, 740)          | 484 (380, 630)          |
| Follow up time, years                   |                         |                   |                     |                         |                         |
| Median (IQR)                            | 0.7 (0.1, 2.0)          | 7.6 (3.7, 13.0)   | 7.8 (5.1, 11.8)     | 10.2 (6.0, 14.0)        | 0.3 (0.0, 1.5)          |

Percentages are relative to all subjects within each group, including the ones with missing data

<sup>A</sup>Data missing for 4 SP subjects and 10 PRIMO subjects

<sup>B</sup>For Primo cohort, baseline is defined as the time of the first available data point

**Supplementary Table S2: HLA typing for slow progressor subjects experiencing loss of control.**

| Subject ID/<br>subgroup          | HLA-A | HLA-A | HLA-B | HLA-B | HLA-C | HLA-C | Bw  | Bw  |
|----------------------------------|-------|-------|-------|-------|-------|-------|-----|-----|
| Subjects showing loss of control |       |       |       |       |       |       |     |     |
| 218001/EC <sup>1</sup>           | A*02  | A*03  | B*07  | B*48  | C*07  | C*08  | Bw6 | Bw6 |
| 109020/EC                        | A02   | A*11  | B*08  | B*56  | Cw*01 | Cw*07 | Bw6 | Bw6 |
| 104002/VC <sup>2</sup>           | A02   | A*02  | B*15  | B*44  | Cw*02 | Cw05  | Bw4 | Bw6 |
| 102018/VC                        | A*01  | A*68  | B*57  | B*73  | C*15  | C*17  | Bw4 | Bw6 |
| 109002/VC                        | A02   | A*02  | B*27  | B*40  | Cw*01 | Cw*03 | Bw4 | Bw6 |
| 216009/VC                        | A*02  | A*03  | B*51  | B*52  | C*12  | C*15  | Bw4 | Bw4 |
| 218004/VC                        | A*03  | A*03  | B*07  | B*07  | C*07  | C*15  | Bw6 | Bw6 |
| 205002/VC                        | A*03  | A*68  | B*14  | B*44  | C*08  | C*14  | Bw6 | Bw4 |
| 110004/VC                        | N/A   | N/A   | N/A   | N/A   | N/A   | N/A   | N/A | N/A |
| 109006/VC                        | A*01  | A*11  | B*13  | B*57  | Cw*03 | Cw*06 | Bw4 | N/A |
| 109019/NVC <sup>3</sup>          | A*02  | A*32  | B*07  | B*57  | Cw*06 | Cw*07 | Bw6 | Bw4 |
| 109017/NVC                       | A*03  | A*24  | B*08  | B*52  | Cw*05 | Cw*07 | Bw6 | Bw4 |
| 106006/NVC                       | A*02  | A*32  | B*14  | B*81  | Cw*02 | Cw*18 | Bw6 | Bw6 |
| 102007/NVC                       | A*03  | A*11  | B*35  | B*57  | Cw*04 | Cw*08 | Bw6 | Bw4 |
| 109018/NVC                       | A*01  | A*11  | B*07  | B*08  | Cw*07 | Cw*07 | Bw6 | Bw6 |
| 110011/NVC                       | N/A   | N/A   | N/A   | N/A   | N/A   | N/A   | N/A | N/A |
| 208003/NVC                       | A*23  | A*23  | B*41  | B*57  | C*07  | C*07  | Bw6 | Bw4 |

<sup>1</sup> EC: Elite Controller

<sup>2</sup> VC: Virologic Controller

<sup>3</sup> NVC: Non-Virologic Controller

**Supplementary Table S3: Cytokine production by CD4 T-cells stimulated through TCR in the presence of either IL-32 $\alpha$  or IL-32 $\gamma$ .**

| Subject ID            | Type of Stimulation | IL-2<br>pg/ml | TNF $\alpha$<br>pg/ml | IFN $\gamma$<br>pg/ml | IL-6<br>pg/ml | IL-17A<br>pg/ml | IL-17F<br>pg/ml | IL-22<br>pg/ml | IL-4<br>pg/ml | IL-5<br>pg/ml | IL-9<br>pg/ml | IL-10<br>pg/ml | IL-13<br>pg/ml |
|-----------------------|---------------------|---------------|-----------------------|-----------------------|---------------|-----------------|-----------------|----------------|---------------|---------------|---------------|----------------|----------------|
| HIV <sup>neg</sup> #1 | TCR                 | 4878.29       | 4592.92               | 1934.07               | 710.83        | <569.41         | 508.6           | 3831.07        | 1068.66       | 4296.54       | 5046.77       | 2556.79        | 4139.03        |
|                       | TCR+ IL-32 $\alpha$ | 3854.8        | 5434.04               | 2823.05               | 996.93        | 846.41          | 773.33          | 4490.04        | 1094.2        | 5684.72       | 6425.46       | 3790.26        | 5144.94        |
|                       | TCR+ IL-32 $\gamma$ | 6235.98       | 5170.65               | 3582.55               | 1802.42       | 1000.91         | 2474.81         | 5076.62        | 1006.84       | 4600.15       | 5824.1        | 2443.49        | 4684.2         |
| HIV <sup>neg</sup> #2 | TCR                 | 2283.52       | 563.53                | 672.23                | 438.04        | <569.41         | 576.38          | 1532.03        | 388.93        | 1376.18       | 804.12        | 216.9          | 1279.02        |
|                       | TCR+ IL-32 $\alpha$ | 3112.46       | 884.79                | 1041.68               | 649.35        | 754.87          | 1119.18         | 1925.51        | 408.94        | 1544.14       | 1445.29       | 275.1          | 1457.61        |
|                       | TCR+ IL-32 $\gamma$ | 3408.38       | 898.43                | 1418.17               | 1355.83       | 1149.61         | 1730.62         | 2932.07        | 404.99        | 1568.64       | 1490.44       | 236.91         | 1608.04        |
| HIV <sup>neg</sup> #3 | TCR                 | 2005.86       | 472.12                | 506.6                 | 301.37        | 704.01          | 473.2           | 1554.49        | 249.8         | 3076.86       | 508.24        | 157.09         | 2141.44        |
|                       | TCR+ IL-32 $\alpha$ | 2330.26       | 637.17                | 711.11                | 376.2         | 860.57          | 641.78          | 1268.21        | 246.39        | 3490.37       | 674.32        | 161.56         | 2247.83        |
|                       | TCR+ IL-32 $\gamma$ | 2611.22       | 645.96                | 801.24                | 761.45        | 1035.14         | 1375.15         | 2224.33        | 286.1         | 3483.6        | 806.34        | 161.56         | 2316.09        |
| HIV <sup>+</sup> #1   | TCR                 | 1814.68       | 582.53                | 554.44                | 164.99        | 704.01          | 259.29          | 986.46         | 207.43        | 1005.52       | 146.5         | 166.01         | 999.24         |
|                       | TCR+ IL-32 $\alpha$ | 2373.7        | 995.55                | 783.94                | 196.83        | 770.99          | 337.81          | 1236.66        | 230.77        | 1408.12       | 164.29        | 110.42         | 1426.8         |
|                       | TCR+ IL-32 $\gamma$ | 2741.51       | 799.01                | 801.24                | 447.9         | 817.2           | 776.74          | 1444.42        | 234.28        | 1182.95       | 192.61        | 152.58         | 1190.91        |
| HIV <sup>+</sup> #2   | TCR                 | 1515.16       | 1265.27               | 993.96                | 421.34        | 927.59          | 866.29          | 2667.33        | 1638.2        | 6241.52       | 3851.28       | 1033.09        | 3957.84        |
|                       | TCR+ IL-32 $\alpha$ | 1557.44       | 1650.76               | 1166.84               | 467.27        | 965.11          | 746.89          | 2631.34        | 2036.45       | 8063.61       | 5232.29       | 1424.91        | 4732.34        |
|                       | TCR+ IL-32 $\gamma$ | 1865.26       | 1427.06               | 1229.78               | 776.95        | 1436.81         | 2312.7          | 3652.4         | 1751.31       | 7025          | 4437.37       | 1060.12        | 4211.13        |
| HIV <sup>+</sup> #3   | TCR                 | 2095.85       | 493.36                | <363.07               | 343.39        | <569.41         | 577.76          | 1954.67        | 342.57        | 1783.52       | 1028.4        | 348.6          | 1680.74        |
|                       | TCR+ IL-32 $\alpha$ | 2602.82       | 768.73                | 588.38                | 424.71        | 1012.48         | 1142.47         | 2270.4         | 386.22        | 2076.8        | 1363.61       | 531.5          | 1859.34        |
|                       | TCR+ IL-32 $\gamma$ | 3191.91       | 1038.11               | 1229.78               | 1357.01       | 1643.82         | 2299.49         | 3601.1         | 407.63        | 2274.52       | 2235.54       | 464.29         | 2267.73        |
